# Supplementary material for: Syntheses, crystal structures, DFT calculations, protein interaction and anticancer activities of water soluble dipicolinic acid-imidazole based oxidovanadium(iv) complexes
Source: Royal Society of Chemistry journal article supplement (doi:10.1039/c7dt02903a), 2017-01-01
Supplement: c7dt02903a1.pdf [file c7dt02903a1.pdf]

**Dalton Transactions**

Electronic Supplementary Information (ESI)

**Syntheses, crystal structures, DFT calculations, protein interaction and anticancer activities of water soluble dipicolinic acid - imidazole based oxido vanadium(IV) complexes**

Debanjana Biswal<sup>a</sup>, Nikhil Ranjan Pramanik<sup>\*b</sup>, Syamal Chakrabarti<sup>\*a</sup>, Michael G.B Drew<sup>c</sup>, Krishnendu Acharya<sup>d</sup>, Swarnendu Chandra<sup>d</sup>

<sup>a</sup>*Department of Chemistry, University College of Science, 92, Acharya Prafulla Chandra Road, Kolkata:700009, West Bengal, India.*

<sup>b</sup>*Department of Chemistry, Bidhannagar College, EB-2, Salt Lake, Kolkata: 700064, India.*

<sup>c</sup>*Department of Chemistry, The University of Reading, Whiteknights, Reading RG6 6AD, UK.*

<sup>d</sup>*Molecular and Applied Mycology and Plant Pathology Laboratory, Department of Botany, University of Calcutta, Kolkata 700019, West Bengal, India.*

---

**Table of Contents:**

**Fig. S1** Electronic spectra of complex **1** in water at room temperature. Inset: Peaks in the visible region obtained at higher complex concentration.

**Fig. S2** Electronic spectra of complex **2** in water at room temperature. Inset: Peaks in the visible region obtained at higher complex concentration.

**Fig. S3** Electronic spectra of complex **3** in water at room temperature. Inset: Peaks in the visible region obtained at higher complex concentration.

**Fig. S4** EPR Spectrum of complex **2** at liquid nitrogen temperature.

**Fig. S5** EPR Spectrum of complex **3** at liquid nitrogen temperature.

**Fig. S6** Cyclic voltammogram of complex **2** in DMF at 298K

**Fig. S7** Cyclic voltammogram of complex **3** in DMF at 298K

**Fig. S8** TG-DT curve of complex **1** under N<sub>2</sub> atmosphere.

**Fig. S9** TG-DT curve of complex **2** under N<sub>2</sub> atmosphere.

**Fig. S10** TG-DT curve of complex **3** under N<sub>2</sub> atmosphere.

**Fig. S11** Diagrams showing the atoms taking part in H-bonding and the aromatic rings involved in  $\pi\cdots\pi$  stacking interaction

**Fig. S12** CD spectra of BSA ( $1 \times 10^{-5}$  M) in the UV-region in the absence and presence of the complexes **1-3** ( $2 \times 10^{-5}$  M) at 25°C and pH 7

**Fig. S13** Molecular docking image of complex **2** with BSA, residues surrounding the binding sites are highlighted.

**Fig. S14** Molecular docking image of complex **2** with BSA, residues surrounding the binding sites are highlighted.

**Table S1** CD secondary structure estimation of BSA in the absence and presence of complexes **1-3** using CDNN Software

**Table S2** Results of molecular docking: Adjacent residues and hydrogen bonding interactions

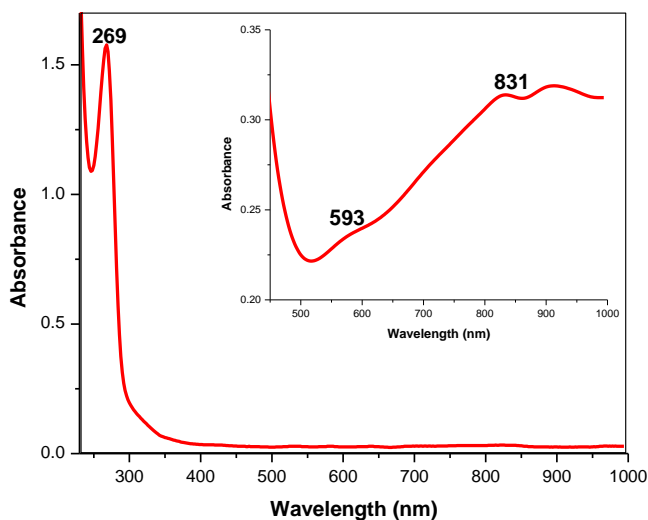

**Fig. S1** Electronic spectra of complex **1** in water at room temperature. Inset: Peaks in the visible region obtained at higher complex concentration.

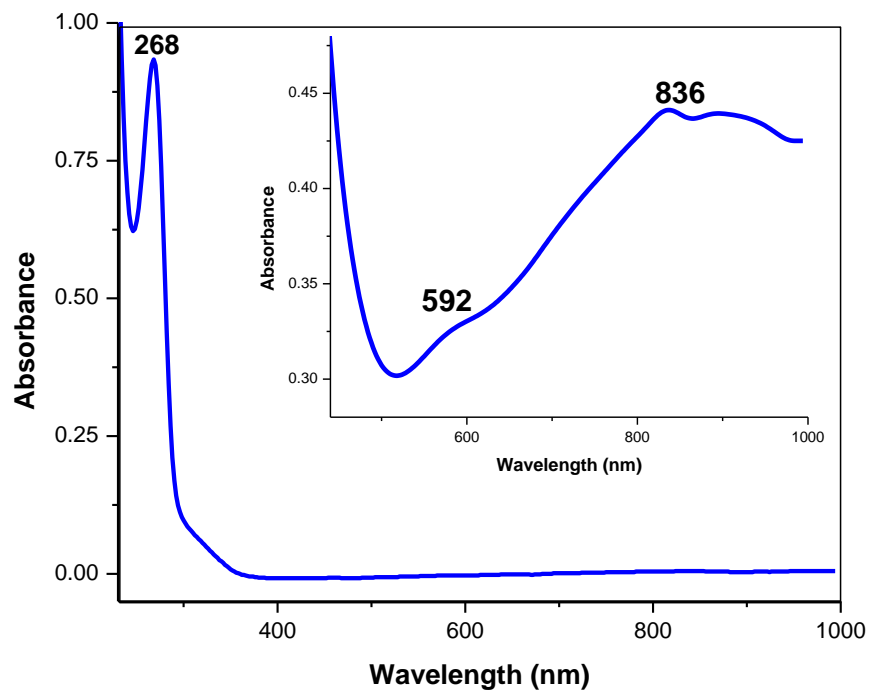

**Fig. S2** Electronic spectra of complex **2** in water at room temperature. Inset: Peaks in the visible region obtained at higher complex concentration.

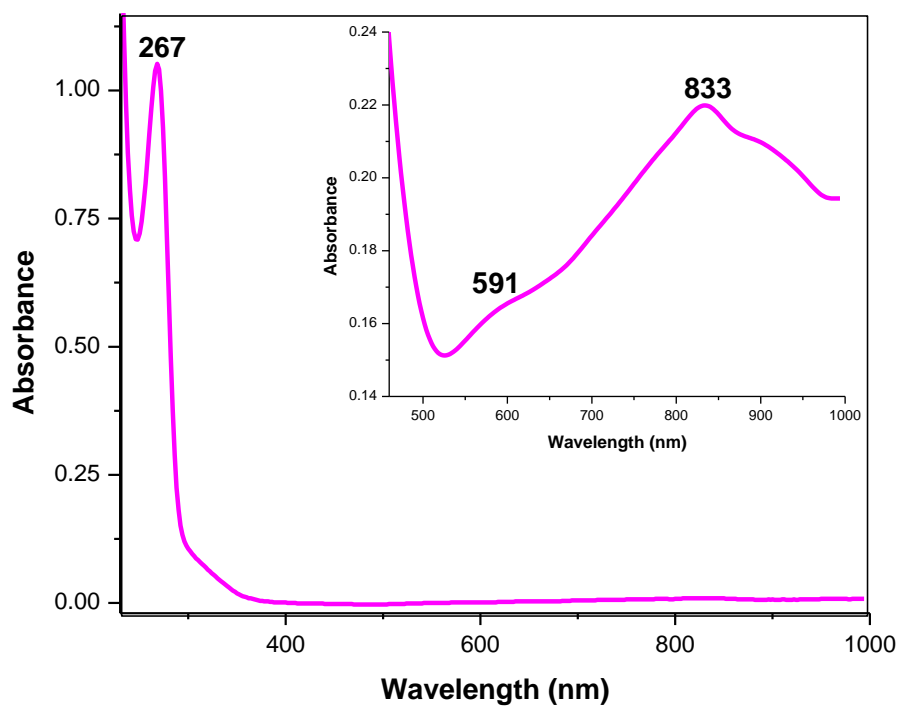

**Fig. S3** Electronic spectra of complex **3** in water at room temperature. Inset: Peaks in the visible region obtained at higher complex concentration.

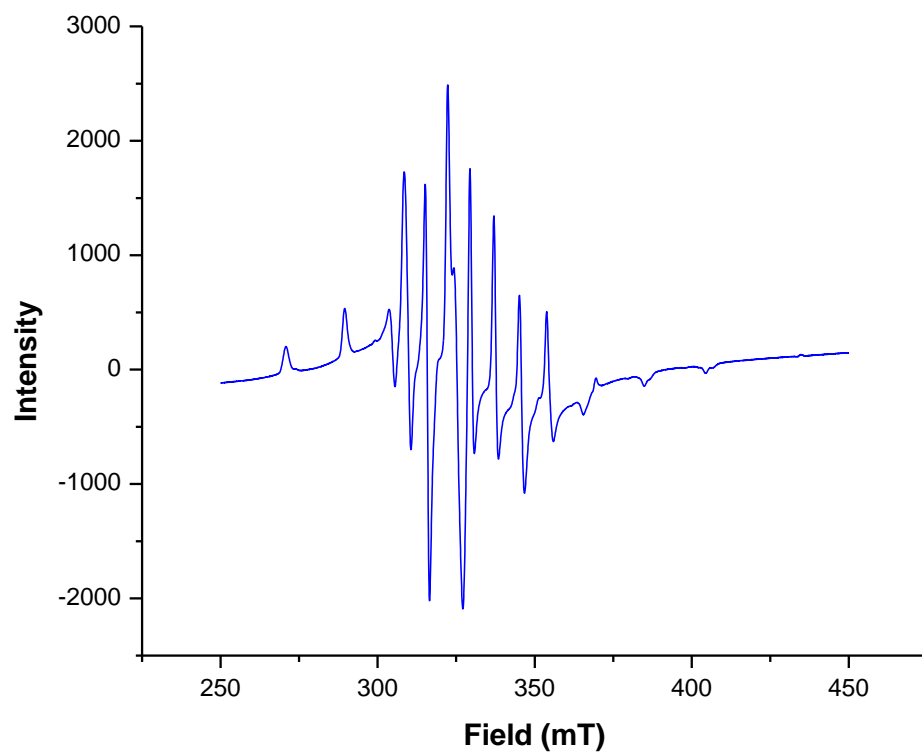

**Fig. S4** EPR Spectrum of complex **2** at liquid nitrogen temperature.

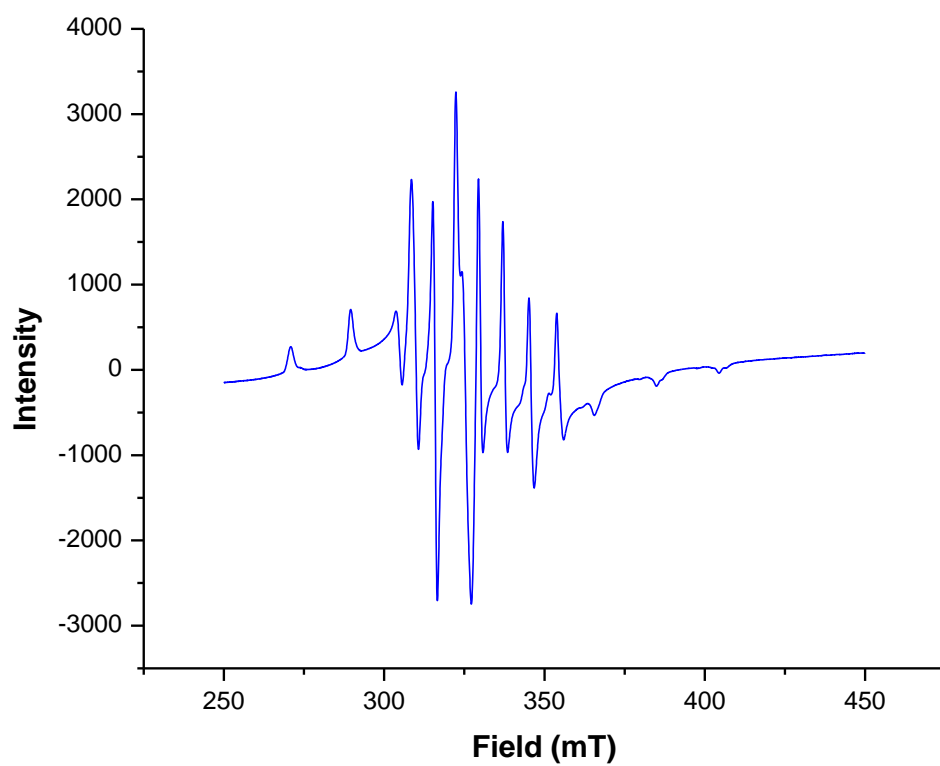

**Fig. S5** EPR Spectrum of complex **3** at liquid nitrogen temperature

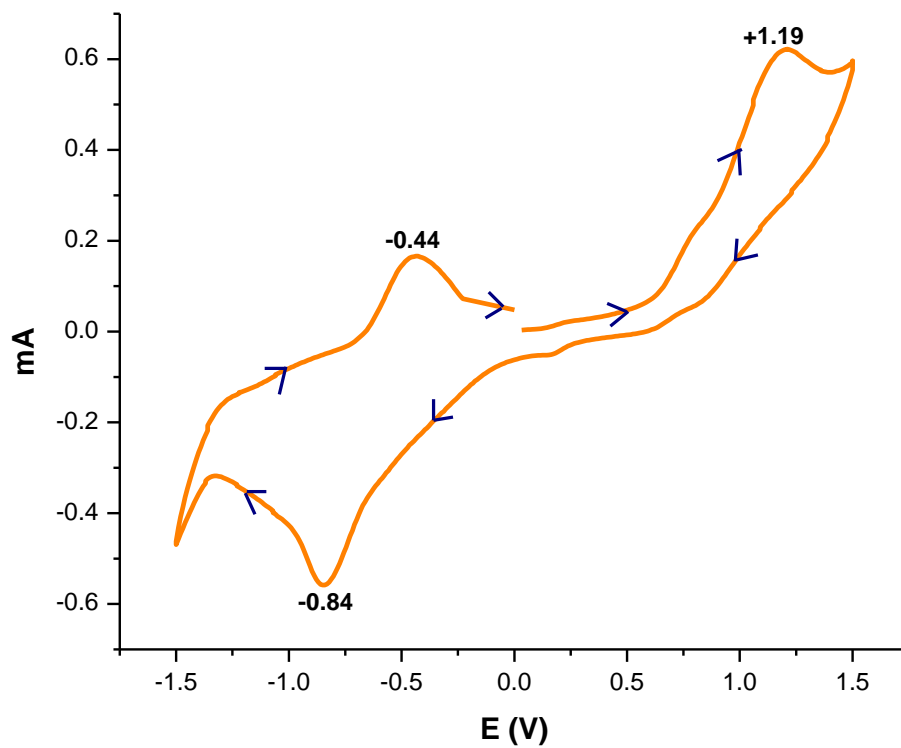

**Fig. S6** Cyclic voltammogram of complex **2** in DMF at 298K

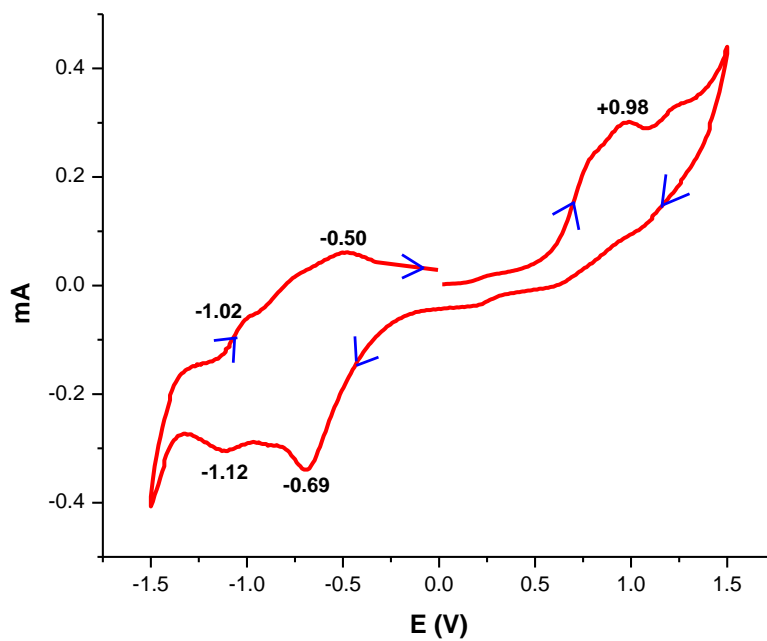

**Fig. S7** Cyclic voltammogram of complex **3** in DMF at 298K

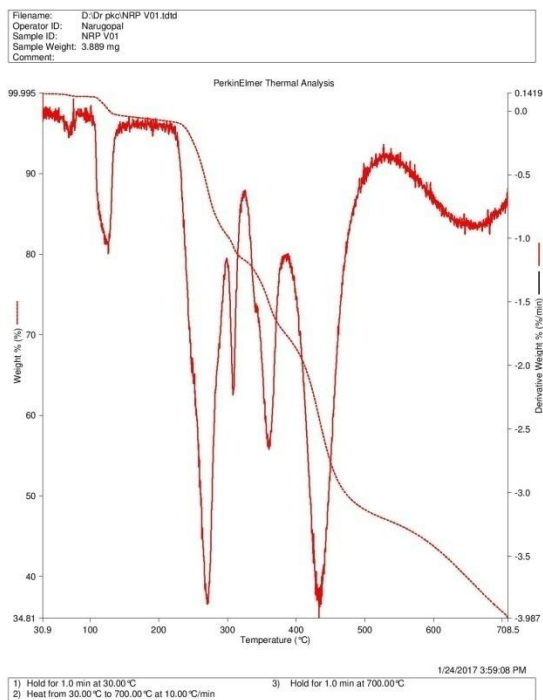

**Fig. S8** TG-DT curve of complex **1** under N<sub>2</sub> atmosphere.

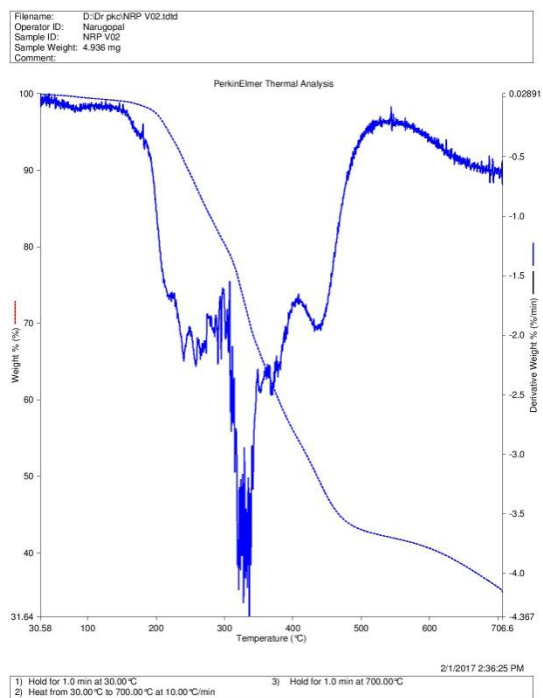

**Fig. S9** TG-DT curve of complex **2** under N<sub>2</sub> atmosphere.

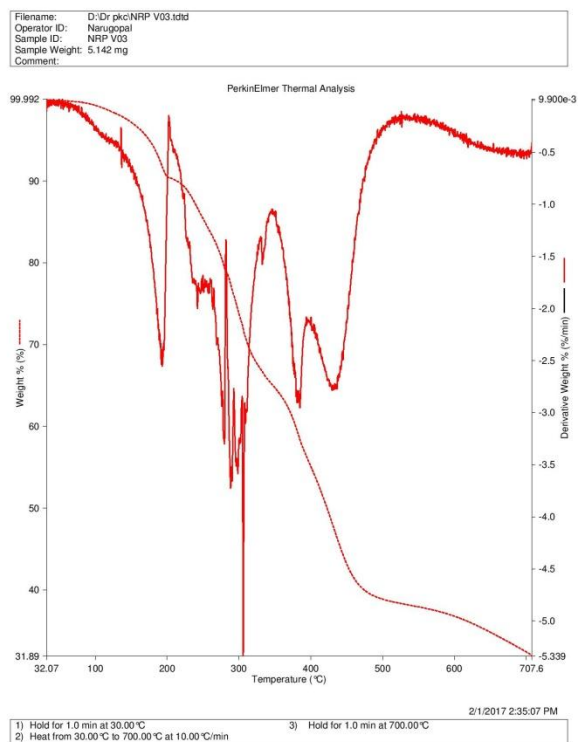

**Fig. S10** TG-DT curve of complex **3** under N<sub>2</sub> atmosphere.

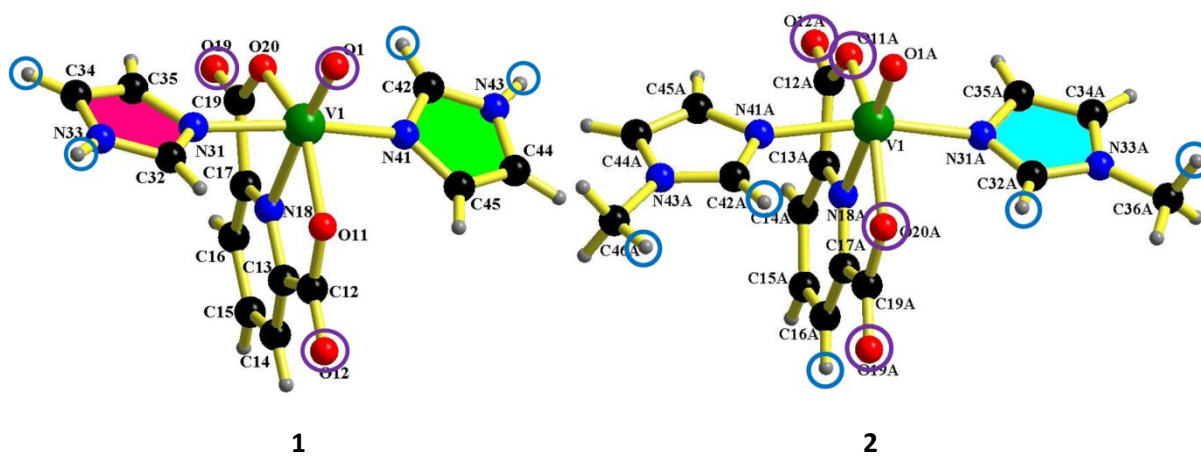

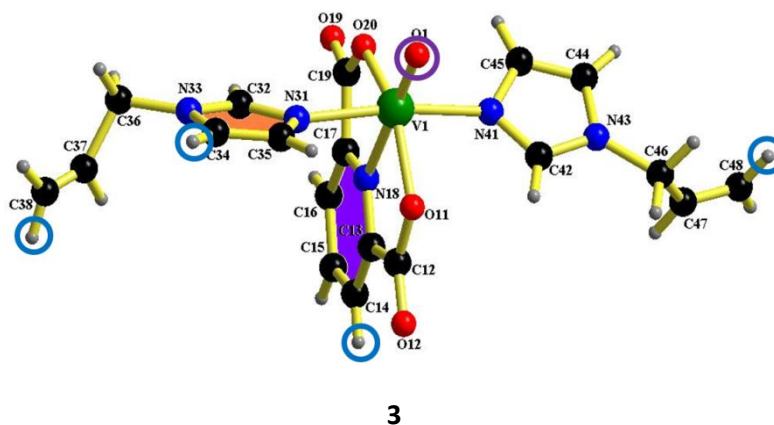

**Fig. S11** Diagrams showing the atoms taking part in H-bonding and the aromatic rings involved in  $\pi\cdots\pi$  stacking interaction

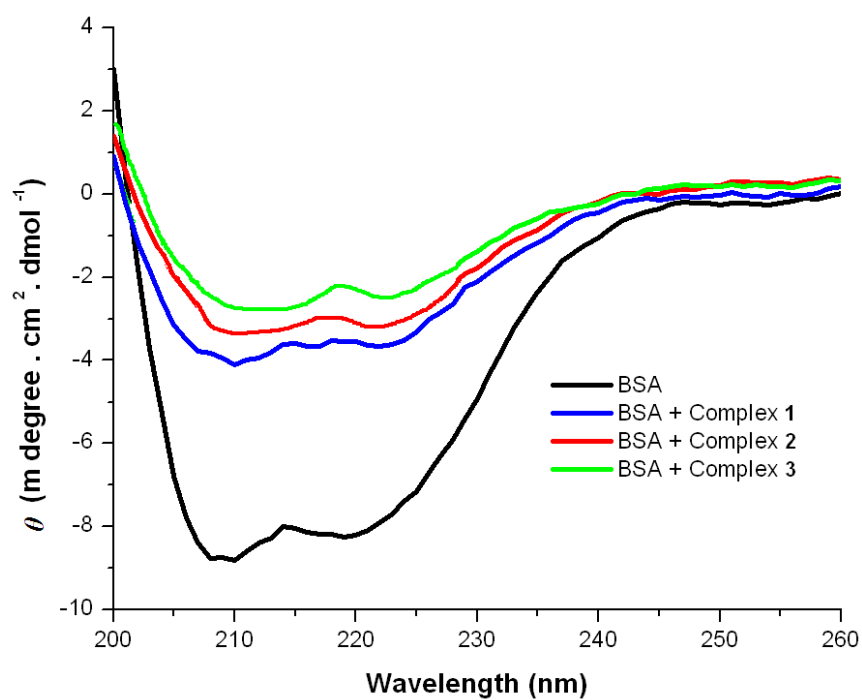

**Fig. S12** CD spectra of BSA ( $1 \times 10^{-5}$  M) in the UV-region in the absence and presence of the complexes **1-3** ( $2 \times 10^{-5}$  M) at 25°C and pH 7



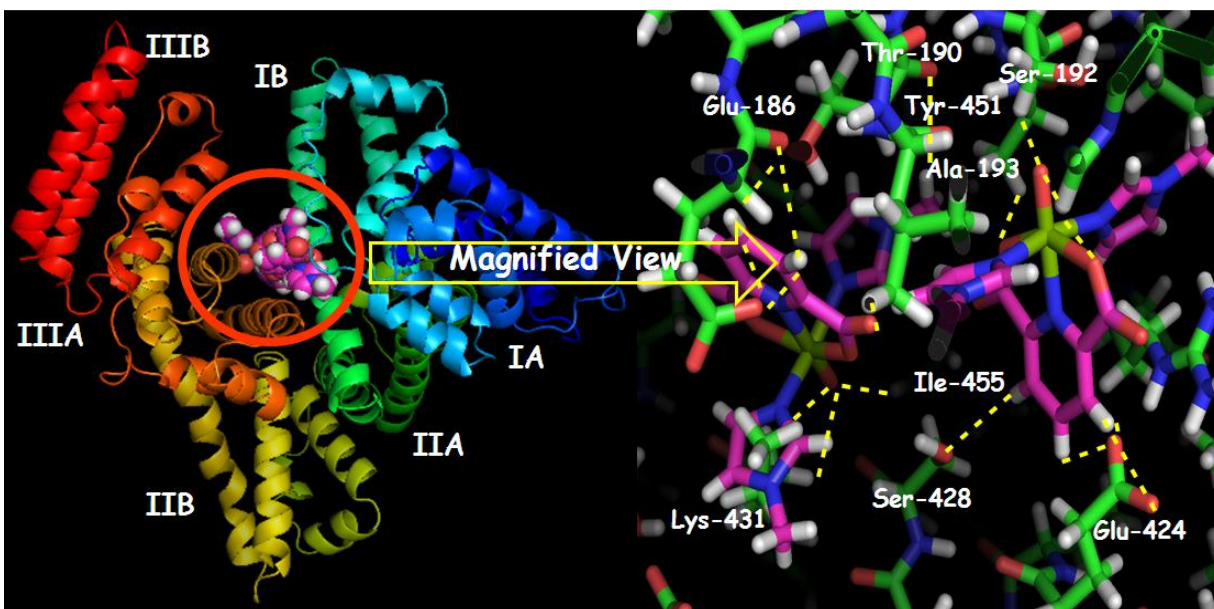

**Fig. S13** Molecular docking image of complex **2** with BSA, residues surrounding the binding sites are highlighted.

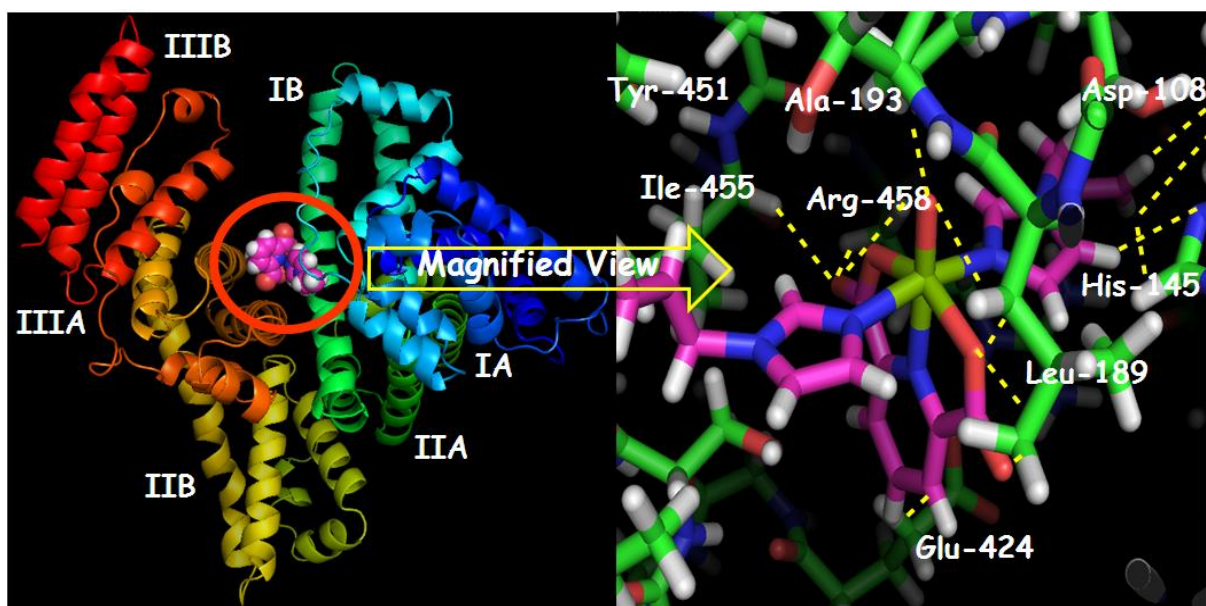

**Fig. S14** Molecular docking image of complex **3** with BSA, residues surrounding the binding sites are highlighted.

**Table S1**

CD secondary structure estimation of BSA in the absence and presence of complexes **1-3** using CDNN Software

| <b>Components conformation</b>    | <b>Free BSA<br/>(<math>1 \times 10^{-5}</math> M)</b> | <b>BSA +<br/>Complex 1<br/>(<math>2 \times 10^{-5}</math> M)</b> | <b>BSA +<br/>Complex 2<br/>(<math>2 \times 10^{-5}</math> M)</b> | <b>BSA +<br/>Complex 3<br/>(<math>2 \times 10^{-5}</math> M)</b> |
|-----------------------------------|-------------------------------------------------------|------------------------------------------------------------------|------------------------------------------------------------------|------------------------------------------------------------------|
| $\alpha$ -Helix (%)               | 85.0                                                  | 38.5                                                             | 31.7                                                             | 24.7                                                             |
| $\beta$ -sheet (Antiparallel) (%) | 1.3                                                   | 7.3                                                              | 9.0                                                              | 11.6                                                             |
| $\beta$ -sheet (Parallel) (%)     | 1.5                                                   | 7.3                                                              | 9.2                                                              | 11.5                                                             |
| $\beta$ -Turn (%)                 | 9.3                                                   | 16.1                                                             | 17.2                                                             | 18.6                                                             |
| Random Coil (%)                   | 7.0                                                   | 27.9                                                             | 33.5                                                             | 40.0                                                             |

**Table S2**

Results of molecular docking: Adjacent residues and hydrogen bonding interactions

| Complex         | Hydrogen bonding interactions                                                                                                                                                                                                                                                                                                                                                                                                                                                                                                                     | Adjacent amino acids                                                                                                            |
|-----------------|---------------------------------------------------------------------------------------------------------------------------------------------------------------------------------------------------------------------------------------------------------------------------------------------------------------------------------------------------------------------------------------------------------------------------------------------------------------------------------------------------------------------------------------------------|---------------------------------------------------------------------------------------------------------------------------------|
| BSA...Complex 1 | <p>(Tyr-160)Ph-O-H...O=V = 2.2 Å</p> <p>(Tyr-160)Ph-H...O=V = 2.9 Å</p> <p>(Tyr-137)Ph-H...O-V=O 2.4 Å</p> <p>(Tyr-137)Ph-H...O=C-O-V = 2.4 Å</p> <p>(Ile-141)-CH<sub>2</sub>-H...O=C-O-V = 1.3 Å</p> <p>(Lys-136)HO-C=O...H-(Imz)-V = 2.9 Å</p>                                                                                                                                                                                                                                                                                                  | Tyr-160,<br>Tyr-137,<br>Lys-136,<br>Glu-140,<br>Leu-115,<br>Lys-116,<br>Pro-117,<br>Glu-182,<br>Leu-122                         |
| BSA...Complex 2 | <p>(Ile-455)-CH<sub>2</sub>-H...O=V = 2.7 Å</p> <p>(Lys-431)-CH-H...O=V = 2.7, 2.9 Å</p> <p>(Arg-458)-C-H...O=C-O-V = 2.8 Å</p> <p>(Leu-189)-C-C-H...O=C-O-V = 2.8 Å</p> <p>(Glu-186)-CH<sub>2</sub>-C-O...H-(Py) = 2.7, 2 Å</p> <p>(Glu-186)-C-C-O...H-(Py) = 3, 2.5 Å</p> <p>(Ser-192)-C-H...O=V = 1.7 Å</p> <p>(His-145)-Imz-H...O=V = 2.8 Å</p> <p>(Ala-193)-C-CH<sub>2</sub>-H...O-V=O = 2.9 Å</p> <p>(Glu-424)-H<sub>2</sub>C-C-O...H-(Py) = 1.7, 1.5, 2.4 Å</p> <p>(Thr-190)-NH<sub>2</sub>-C-C-O...H-CH<sub>2</sub>-(1-methimz) = 3 Å</p> | Ile-455,<br>Lys-431,<br>Arg-458,<br>Glu-186,<br>Leu-189,<br>Ser-192,<br>His-145,<br>Thr-190,<br>Glu-424,<br>Ala-193,<br>Tyr-451 |
| BSA...Complex 3 | <p>(Ala-193)-CH<sub>2</sub>-H...O=V = 2.2 Å</p> <p>(Leu-189)-CH<sub>2</sub>-H...O=V = 3.0 Å</p> <p>(Leu-189)-C-H...O-V=O = 2.2, 2.9 Å</p> <p>(Leu-189)-C-H...O=C-O-V = 1.8 Å</p> <p>(Glu-424)-C-O...H-(Py) = 2.9 Å</p> <p>(Arg-458)-CH-H...O=C-O-V = 2.7, 2.9 Å</p> <p>(Ile-455)-CH<sub>2</sub>-H...O=C-O-V = 2.6 Å</p> <p>(His-145)-Imz-N...H-(1-allylimz) = 2.8 Å</p> <p>(Asp-108)-C-O...H-CH=CH-CH<sub>2</sub>-N-(1-allylimz) = 3, 2.6, 2.9 Å</p>                                                                                              | Ala-193,<br>Leu-189,<br>Glu-424,<br>Arg-458,<br>Ile-455,<br>His-145,<br>Asp-108                                                 |
